# Supplementary material for: Dynamic kirigami structures for integrated solar tracking
Source: PubMed Central journal article supplement (PMC4569711; doi:10.1038/ncomms9092), 2015-09-08
Supplement: ncomms9092-s1.pdf [file ncomms9092-s1.pdf]

## Supplementary Figure 1

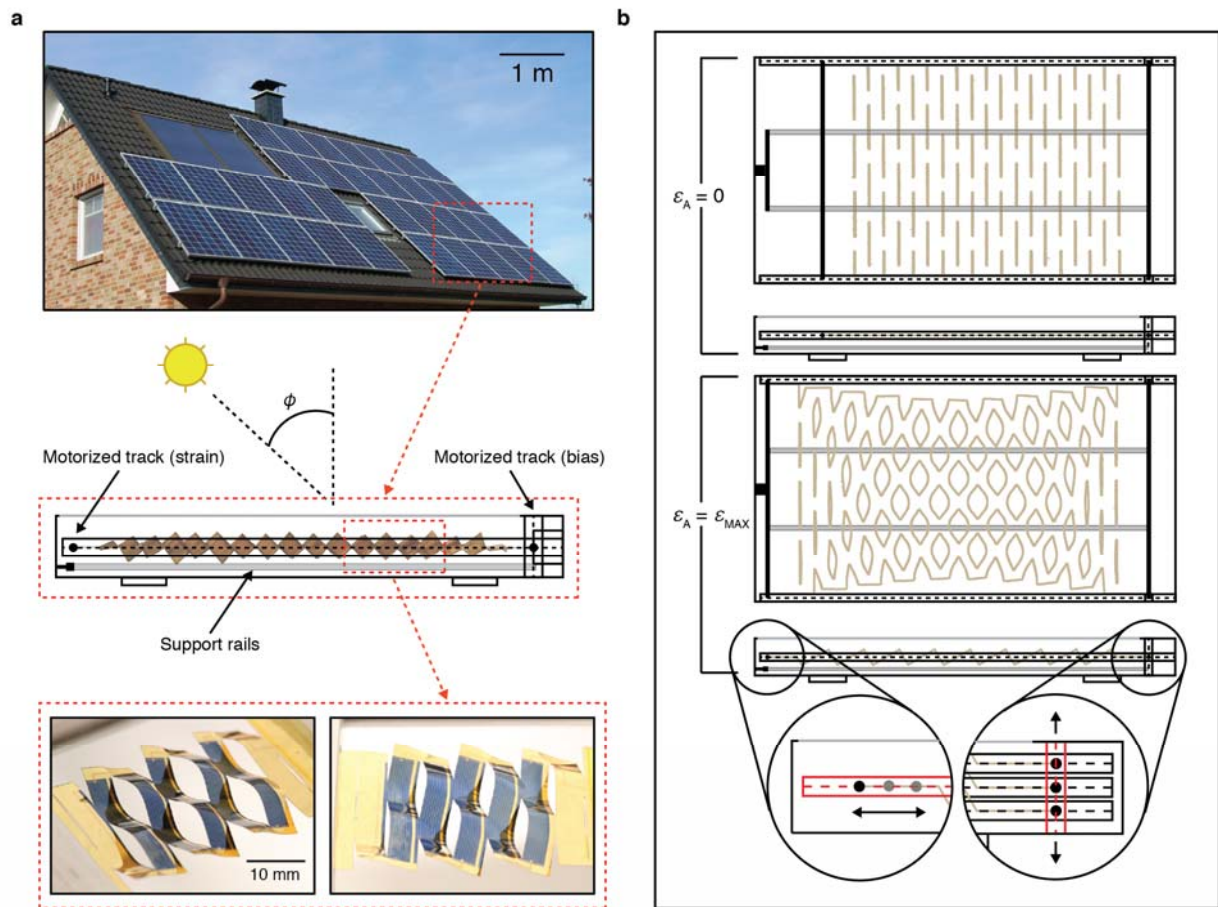

**Rooftop kirigami tracking and schematics of module.** **(a)** Thin-film kirigami constructs may be integrated with low-profile, rigid enclosures to ensure weatherproofing and compatibility with existing rooftop installation hardware. Tensioned support cables may be used in large arrays support system weight and prevent sagging of the structure. **(b)** Schematic view of kirigami tracking system when  $\epsilon_A = 0$  and also maximum strain (i.e.  $\epsilon_A = \epsilon_{MAX}$ ). Note the detailed views of each motorized track, which are used to provide strain and vertical biasing during operation.

## Supplementary Figure 2

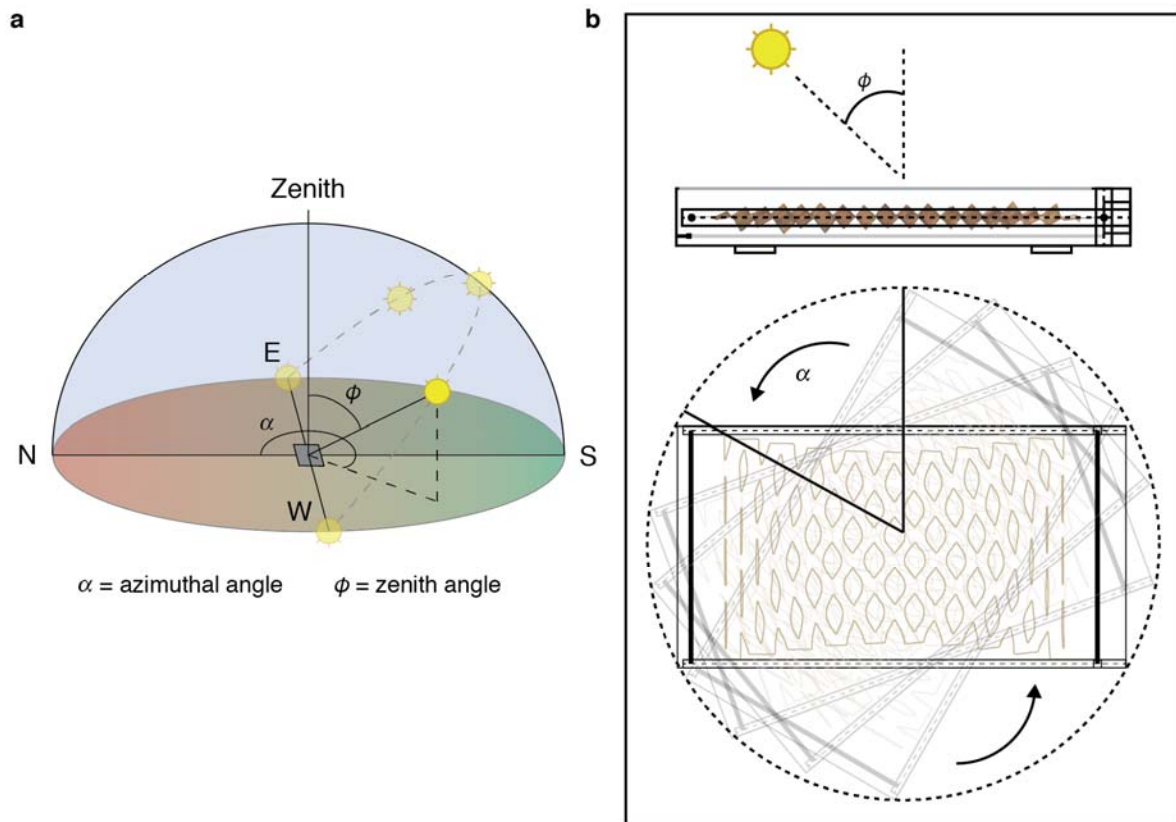

**Dual-axis tracking using kirigami tracker.** (a) The azimuthal ( $\alpha$ ) and zenith ( $\phi$ ) angles fully characterize the trajectory of the sun as a function of time of day, time of year, and geographic location. (b) To enable dual-axis tracking, the proposed kirigami tracker need simply be rotated about its base to track the azimuth of the sun.

### Supplementary Figure 3

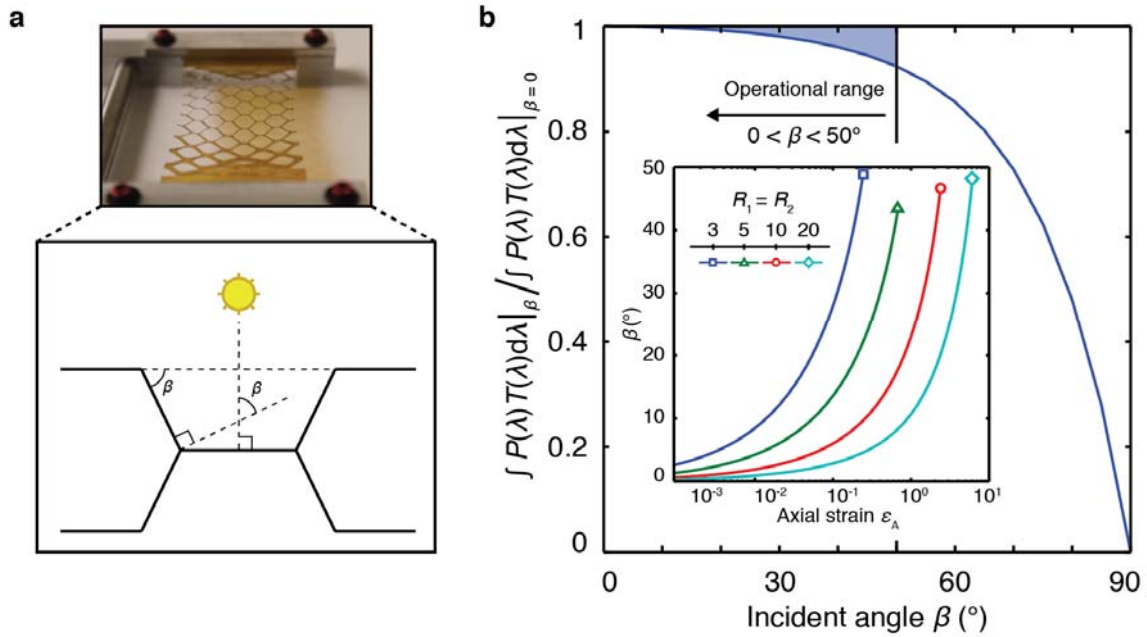

**Surface reflection losses and anti-reflection coating. (a)** Due to the bowing of the kirigami tracker out of the original plane of the sheet, we must account for oblique angle incidence and any reflection losses as a function of angle,  $\beta$ . **(b)** Normalized transmitted power integrated from 350 to 900 nm vs.  $\beta$  for the bilayer ARC (49 nm  $\text{TiO}_2$  and 81 nm  $\text{MgF}_2$ ) used in this study. Incident power,  $P(\lambda)$ , was taken as AM1.5G, and transmission,  $T(\lambda)$ , was calculated using common transfer matrix methods. *Inset:*  $\beta$  vs. axial strain,  $\epsilon_A$ , for  $R_1 = R_2 = 3, 5, 10, \text{ and } 20$ . Interestingly enough, while each sample tracks to a different maximum  $\epsilon_A$  (according to the principles of optimal tracking outlined in Fig. 3),  $\beta$  at  $\epsilon_A$  (max) remains consistent, and below  $50^\circ$ . Thus, we conclude  $0^\circ < \beta < 50^\circ$  signifies the operating range for tracking, over which normalized transmission is shown to remain relatively constant.

**Supplementary Figure 4**

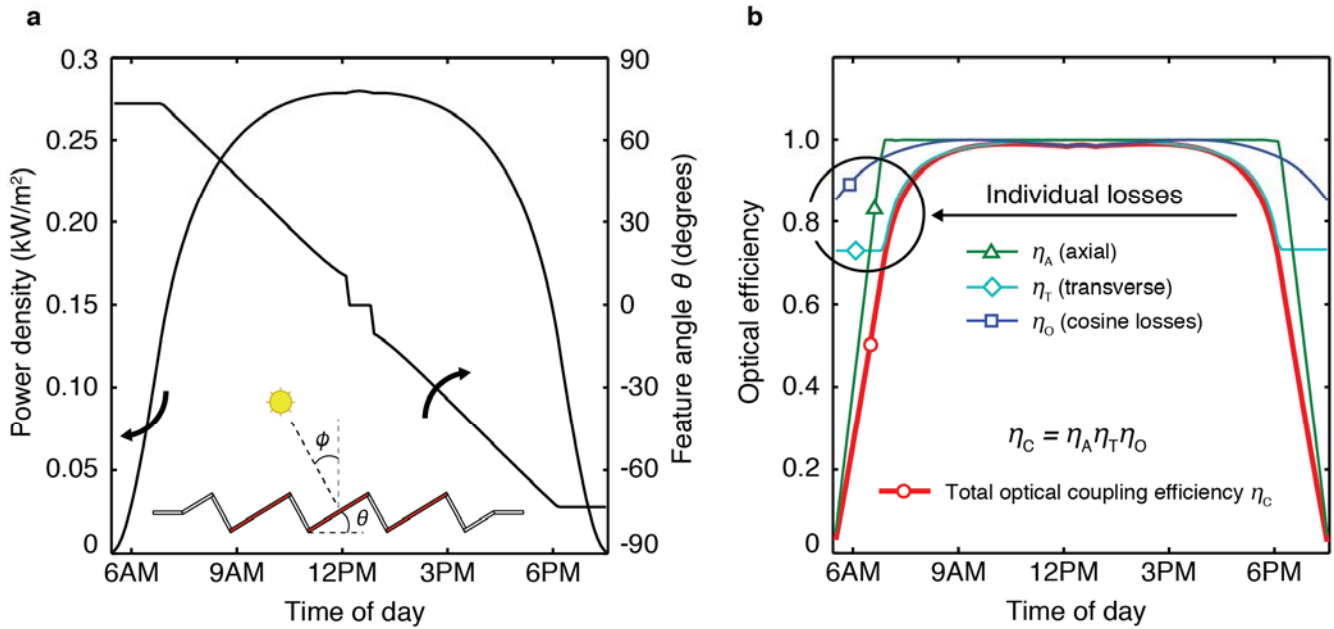

**Additional system response and optical efficiency breakdown. (a)** Power density and feature angle,  $\theta$ , vs. time of day for a kirigami tracking structure in Phoenix, AZ (33.45° N, 112.07° W) during the summer solstice, where  $R_1 = R_2 = 5$ . PCE was assumed to be 20%. **(b)** Individual optical loss mechanisms for a kirigami tracking structure in Phoenix, AZ during the summer solstice, where  $R_1 = R_2 = 5$ . The total optical efficiency is also shown.

### Supplementary Figure 5

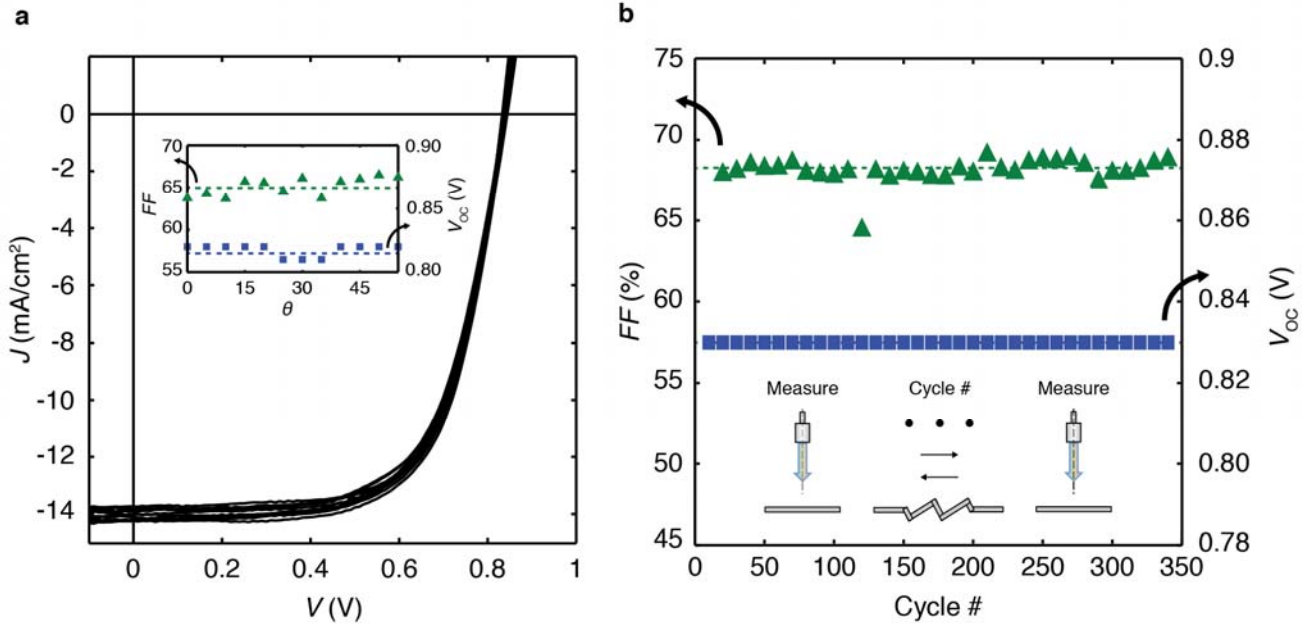

**Effect of cycling on electrical response for kirigami tracker. (a)** J-V characteristics for a Kapton®/GaAs tracker where  $R_1 = R_2 = 5$  at incremental angles of simulated AM1.5G incidence at 1 sun ( $100 \text{ mW/cm}^2$ ) intensity, oriented normal to the surface of the solar cells (i.e.  $\phi = \theta$ ). Inset: Fill factor,  $FF$ , and open circuit voltage,  $V_{OC}$ , show no appreciable degradation up until the optimal  $\theta^*$ , and the variation as shown ( $\pm 1.1$  and  $\pm 4.5$  mV for  $FF$  and  $V_{OC}$ , respectively) is attributed to the error in control over feature angle ( $\pm 1.0^\circ$ , as noted earlier in the text). The power conversion efficiency of these devices under 1 sun AM1.5G illumination was  $7.4 \pm 0.1\%$  at the outset, with virtually no degradation upon cycling. **(b)**  $FF$  and  $V_{OC}$  vs. cycle number for a Kapton®/GaAs tracker, where  $R_1 = R_2 = 5$ . There was no systematic change in  $FF$  or  $V_{OC}$ , with the random variation in measurements due to error in control over feature angle.

## Supplementary Note 1

Derivation of geometric response

Feature angle,  $\theta$

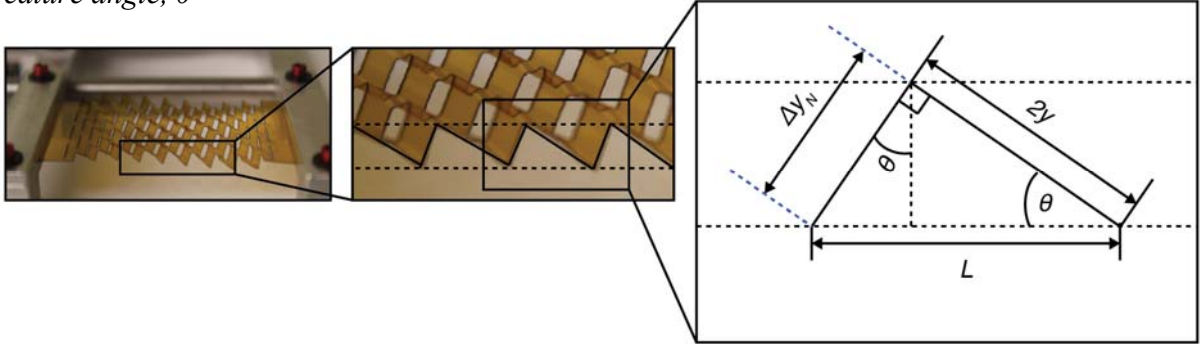

$$L_0 = 2y \quad (1)$$

$$L = \frac{2y}{\cos \theta} \quad (2)$$

$$\Delta y_N = 2y \tan \theta \quad (3)$$

$$\varepsilon_A = \frac{L - L_0}{L_0} = \frac{1}{\cos \theta} - 1 \rightarrow \theta = \cos^{-1} \left( \frac{1}{\varepsilon_A + 1} \right) \quad (4)$$

Transverse strain,  $\varepsilon_T$

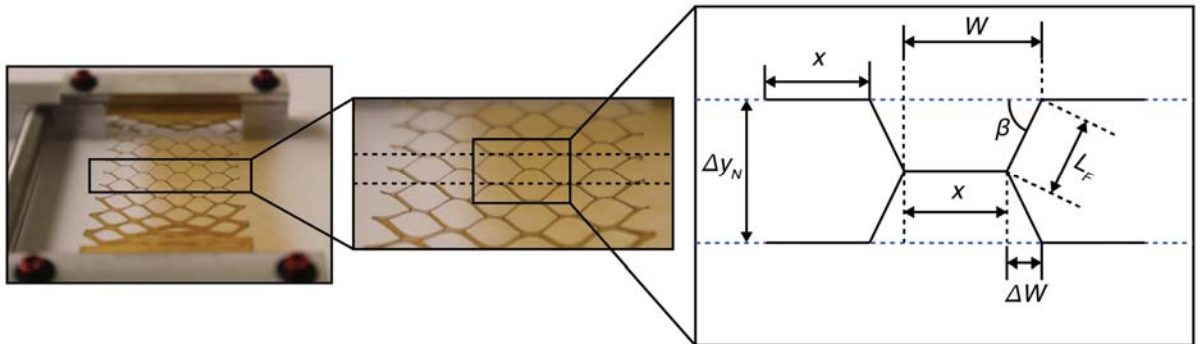

$$W_0 = x + L_F \quad (5)$$

$$W = x + \Delta W \quad (6)$$

$$\varepsilon_T = \frac{W - W_0}{W_0} = \frac{L_F \cos \beta - L_F}{x + L_F} \quad (7)$$

where:

$$\Delta W = L_F \cos \beta \quad (8)$$

$$\beta = \sin^{-1} \left( \frac{y \tan \theta}{L_F} \right) \quad (9)$$

$$L_F = \frac{L_C - x}{2} \quad (10)$$

Substituting  $\Delta W$ ,  $\beta$ , and  $L_F$  and using  $R_1 = L_C/x$  and  $R_2 = L_C/y$  to non-dimensionalize,

simplification of  $\varepsilon_T$  yields:

$$\varepsilon_T = \frac{R_1 - 1}{R_1 + 1} \left[ \cos \left( \sin^{-1} \left( \frac{2R_1 \tan \theta}{R_1 R_2 - R_2} \right) \right) - 1 \right] \quad (11)$$

## Supplementary Note 2

Derivation of coupling efficiency,  $\eta_c$

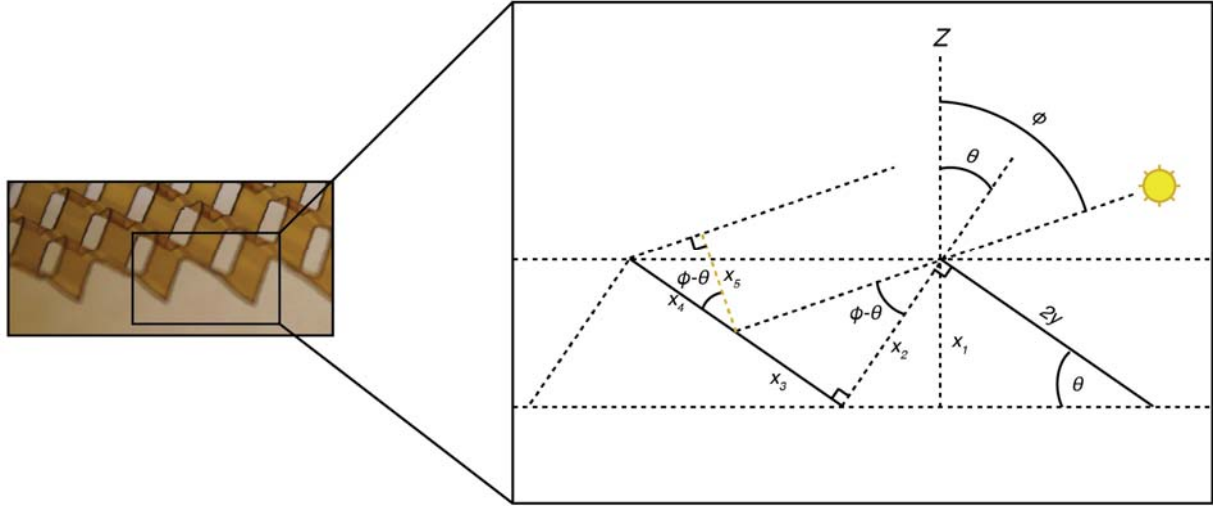

To determine the total coupling efficiency,  $\eta_c$ , we must account for individual optical coupling efficiencies in the axial ( $\eta_A$ ) and transverse ( $\eta_T$ ) directions, as well as cosine losses ( $\eta_O$ ) and surface reflection ( $\eta_R$ ) at oblique incident angles:

$$\eta_c = \eta_A \eta_T \eta_O (1 - \eta_R) \quad (12)$$

In the presence of a suitable anti-reflective coating (ARC) (such as the  $\text{TiO}_2/\text{MgF}_2$  bilayer ARC used in this paper, see Supplementary Fig. 3),  $\eta_R$  becomes negligible such that:

$$\eta_c = \eta_A \eta_T \eta_O \quad (13)$$

Using the supplemental figure above to determine  $\eta_A$ :

$$x_1 = 2y \sin \theta \quad (14)$$

$$x_2 = \frac{x_1}{\cos \theta} = 2y \tan \theta \quad (15)$$

$$x_3 = x_2 \tan(\phi - \theta) = 2y \tan \theta \tan(\phi - \theta) \quad (16)$$

$$x_4 = 2y - x_3 = 2y - 2y \tan \theta \tan(\phi - \theta) = 2y [1 - \tan \theta \tan(\phi - \theta)] \quad (17)$$



$$\eta_A = \frac{x_4}{2y} = 1 - \tan \theta \tan(\phi - \theta) \text{ for } \phi > \theta \quad (18)$$

$$\text{else } \eta_A = 1 \quad (19)$$

$$\eta_T = \frac{W}{W_0} = \varepsilon_A + 1 \quad (20)$$

$$\eta_O = \cos \gamma \quad (21)$$

where  $\gamma$  is the angle between the normal to the cell and the source:

$$\gamma = \cos^{-1} \left( \frac{a \cdot b}{|a||b|} \right) \quad (22)$$

where:

$$a = [-\sin \phi \cos \alpha \quad \sin \phi \sin \alpha \quad \cos \phi] \quad (23)$$

and (for a panel with an E-W axis of rotation as was used in Phoenix, AZ during this study):

$$b = [0 \quad -\tan \theta \quad -1] \quad (24)$$

Here,  $\phi$  is the zenith angle,  $\alpha$  is the azimuthal angle as measured clockwise from North, and  $\theta$  the feature angle of the kirigami tracking structure.

Thus, for a kirigami tracking system with an E-W axis of rotation:

$$\eta_C = \eta_A \eta_T \eta_O = [1 - \tan \theta \tan(\phi - \theta)]_0^1 (\varepsilon_A + 1) \cos \gamma \quad (25)$$

For the case when the optical source is moving in the plane normal to the tracking axis (as per the figure above), cosine losses are solely dependent on  $\theta$  and  $\phi$ :

$$\eta_O = \cos(\phi - \theta) \quad (26)$$

$$\eta_C = \eta_A \eta_T \eta_O = [1 - \tan \theta \tan(\phi - \theta)] (\varepsilon_A + 1) \cos(\phi - \theta) = (\varepsilon_A + 1) \sec \theta \cos \phi \quad (27)$$

where:

$$\theta = \cos^{-1}\left(\frac{1}{\varepsilon_A + 1}\right) \quad (4)$$

Upon simplifying,  $\eta_C$  may be written as:

$$\eta_C = \cos\phi(\varepsilon_A + 1)(\varepsilon_T + 1) \quad (28)$$
